# Supplementary figures and images for: Tunable sequential pathways through spatial partitioning and frustration tuning in soft metamaterials
Source: Royal Society of Chemistry journal article supplement (doi:10.1039/d3sm01174g), 2023-12-26

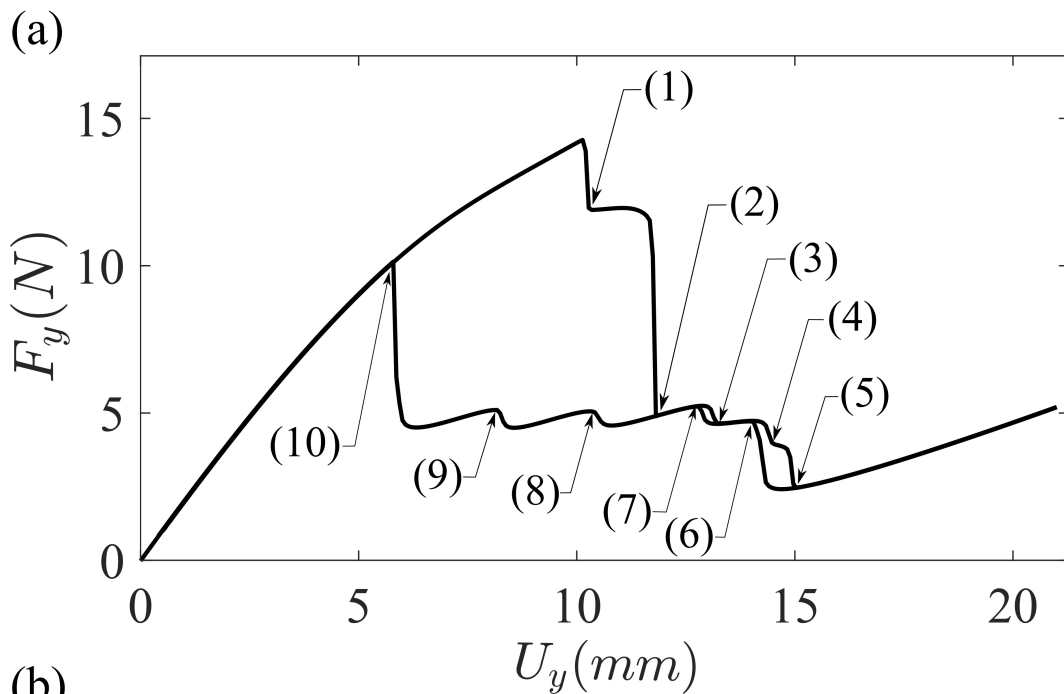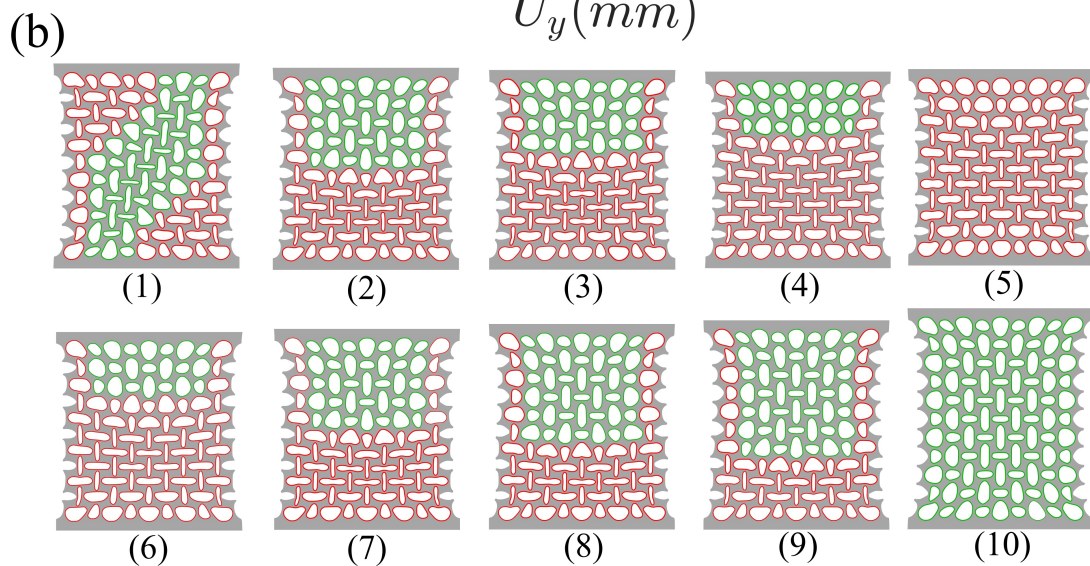

Supplement: d3sm01174g3.pdf [file d3sm01174g3.pdf]

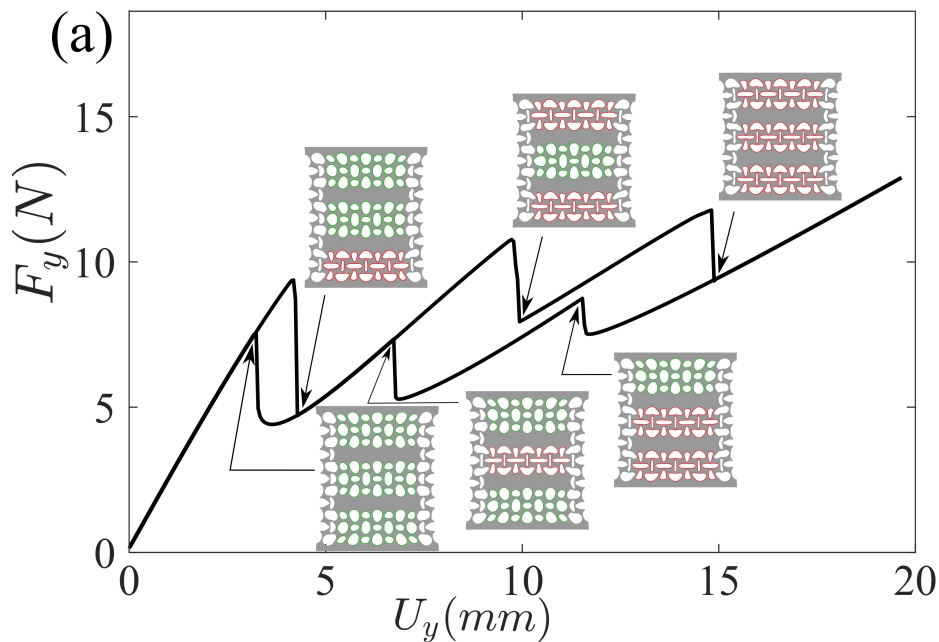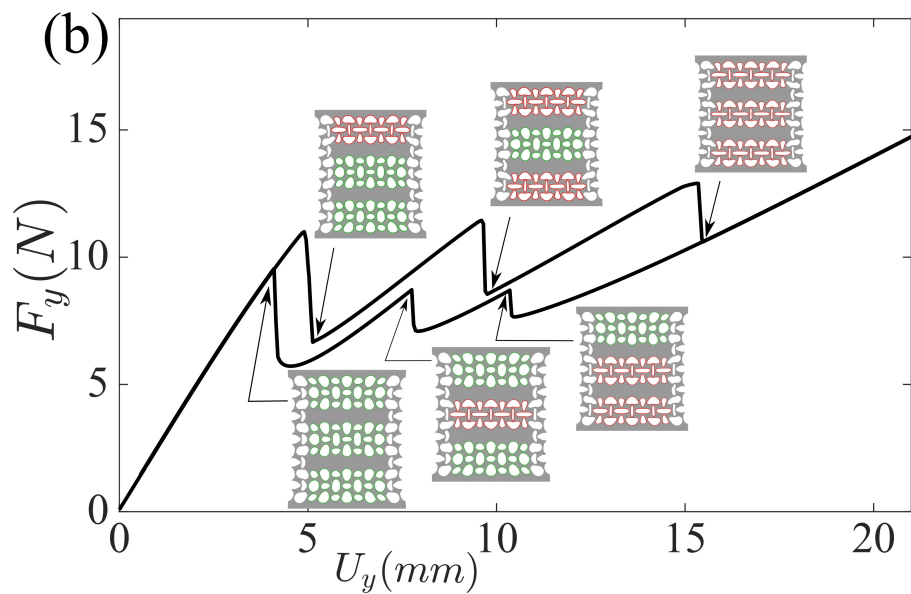

Supplement: d3sm01174g4.pdf [file d3sm01174g4.pdf]

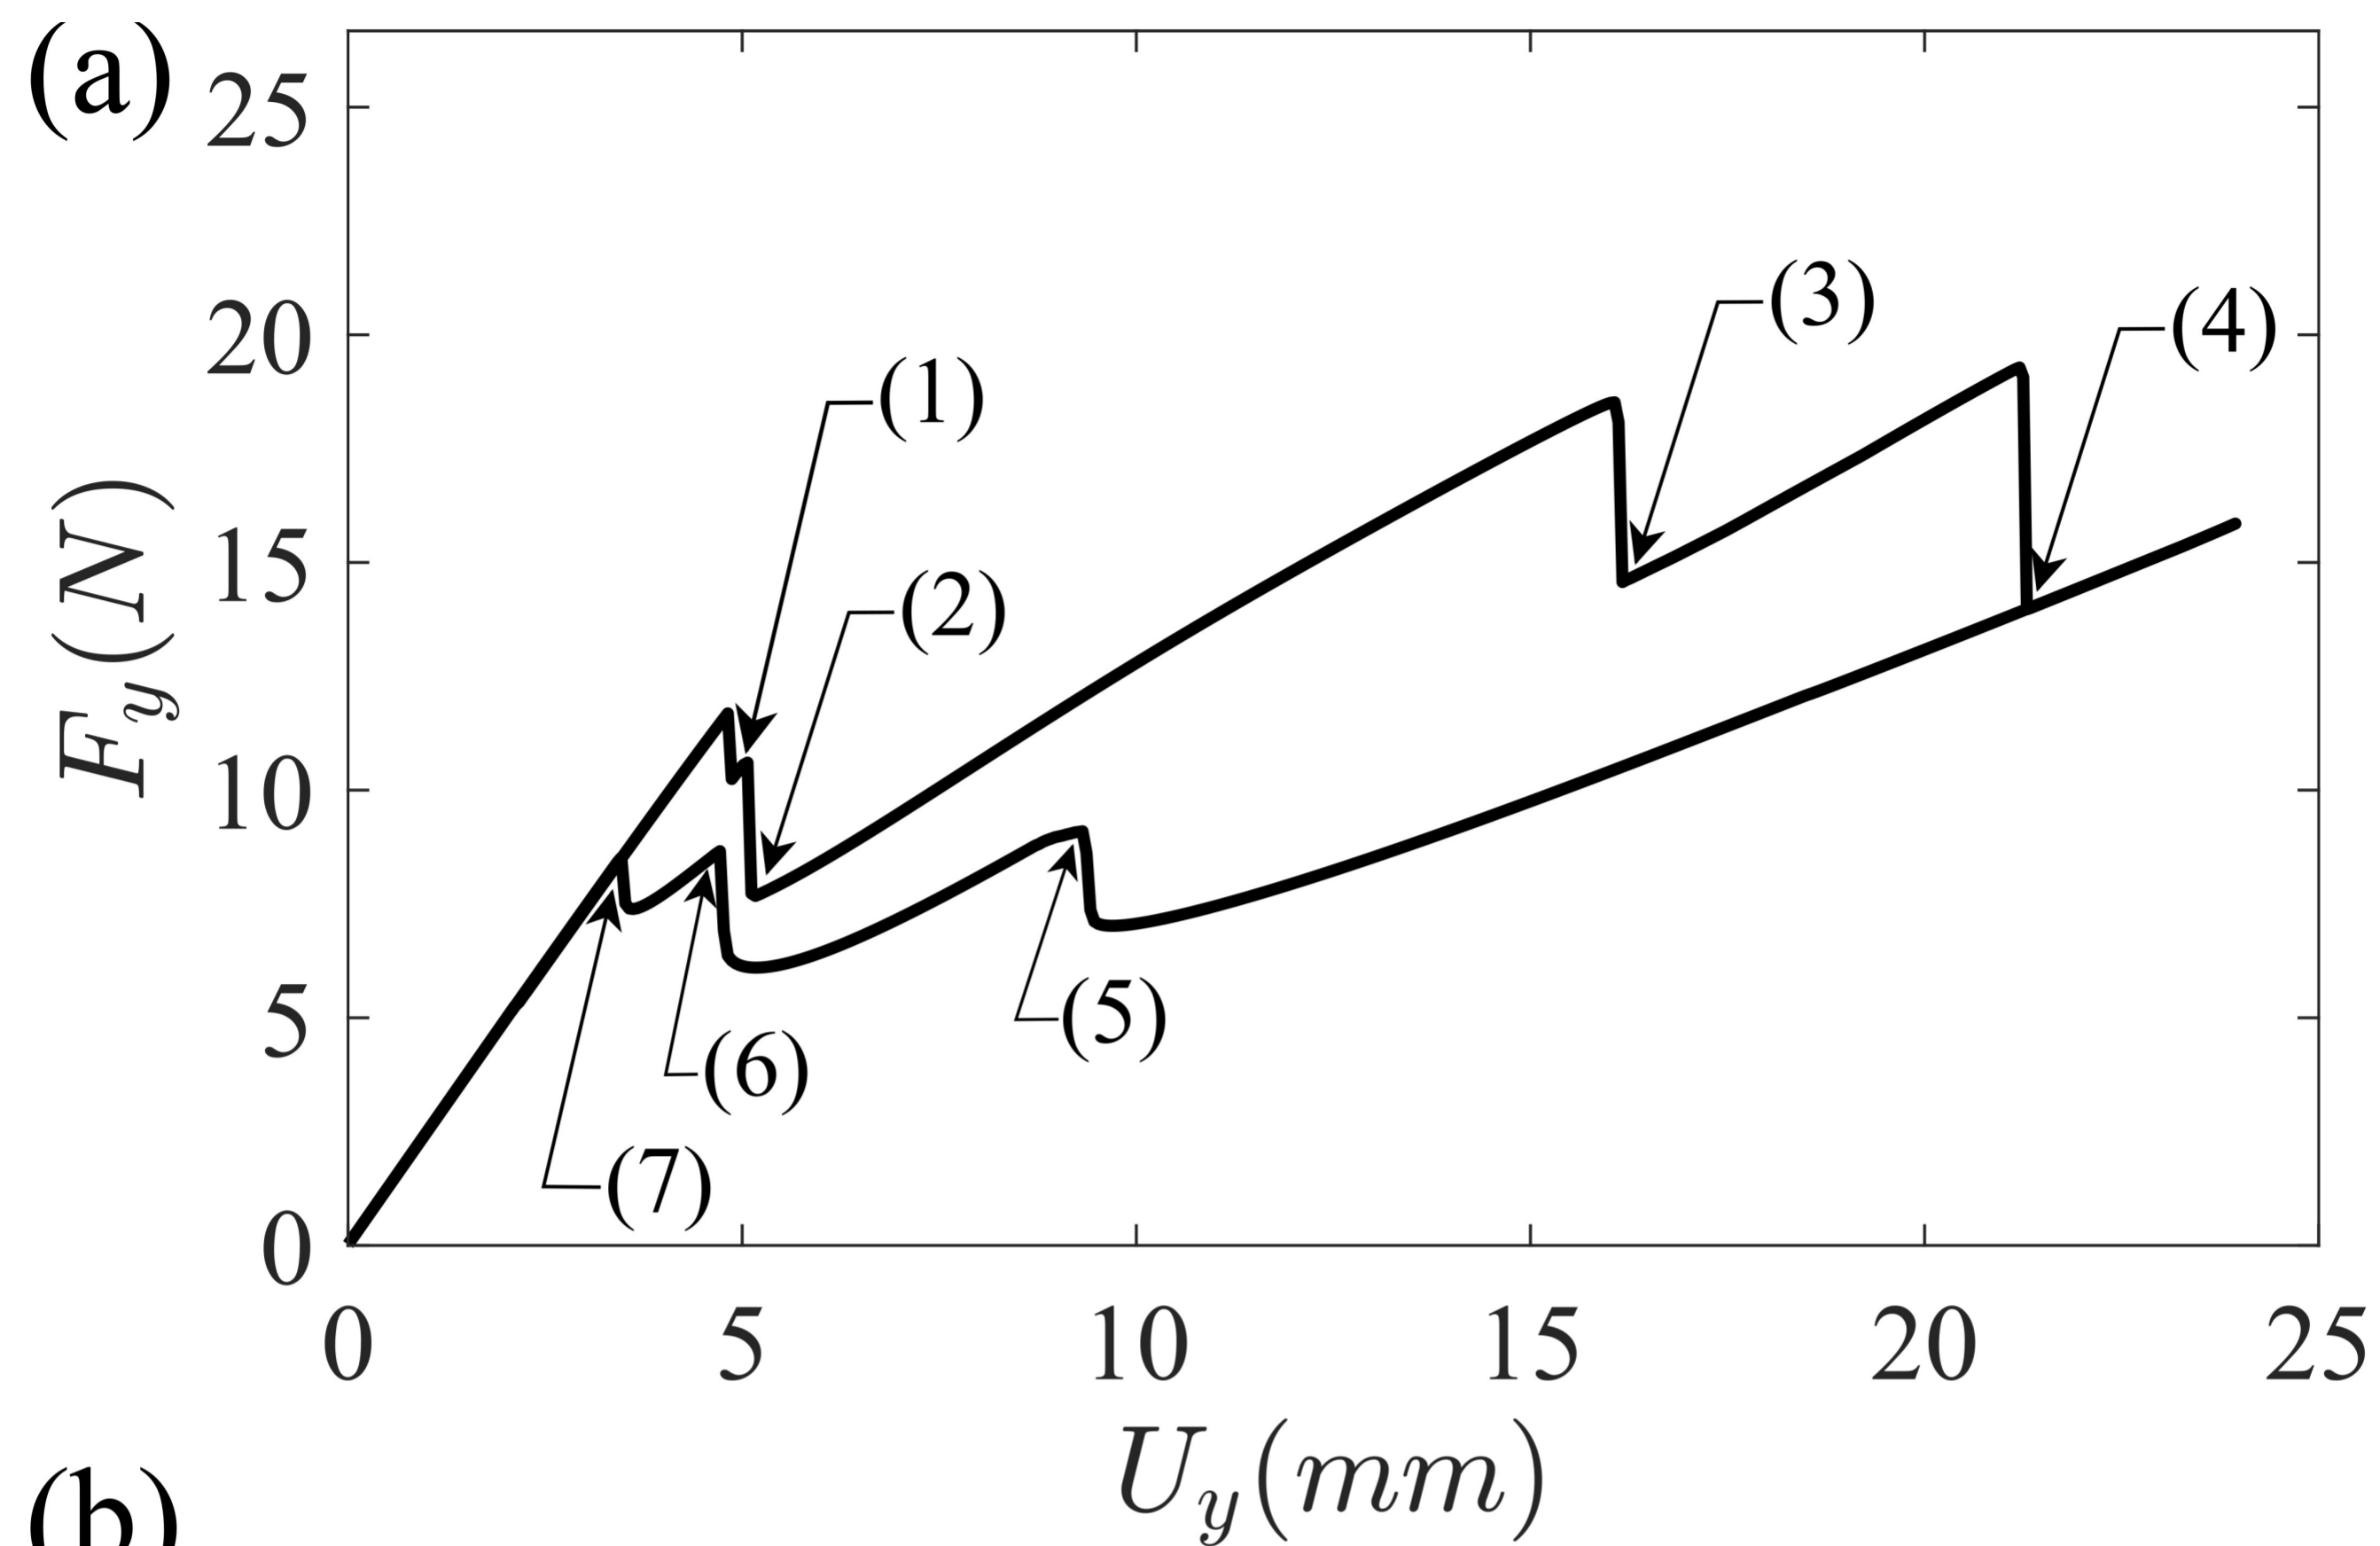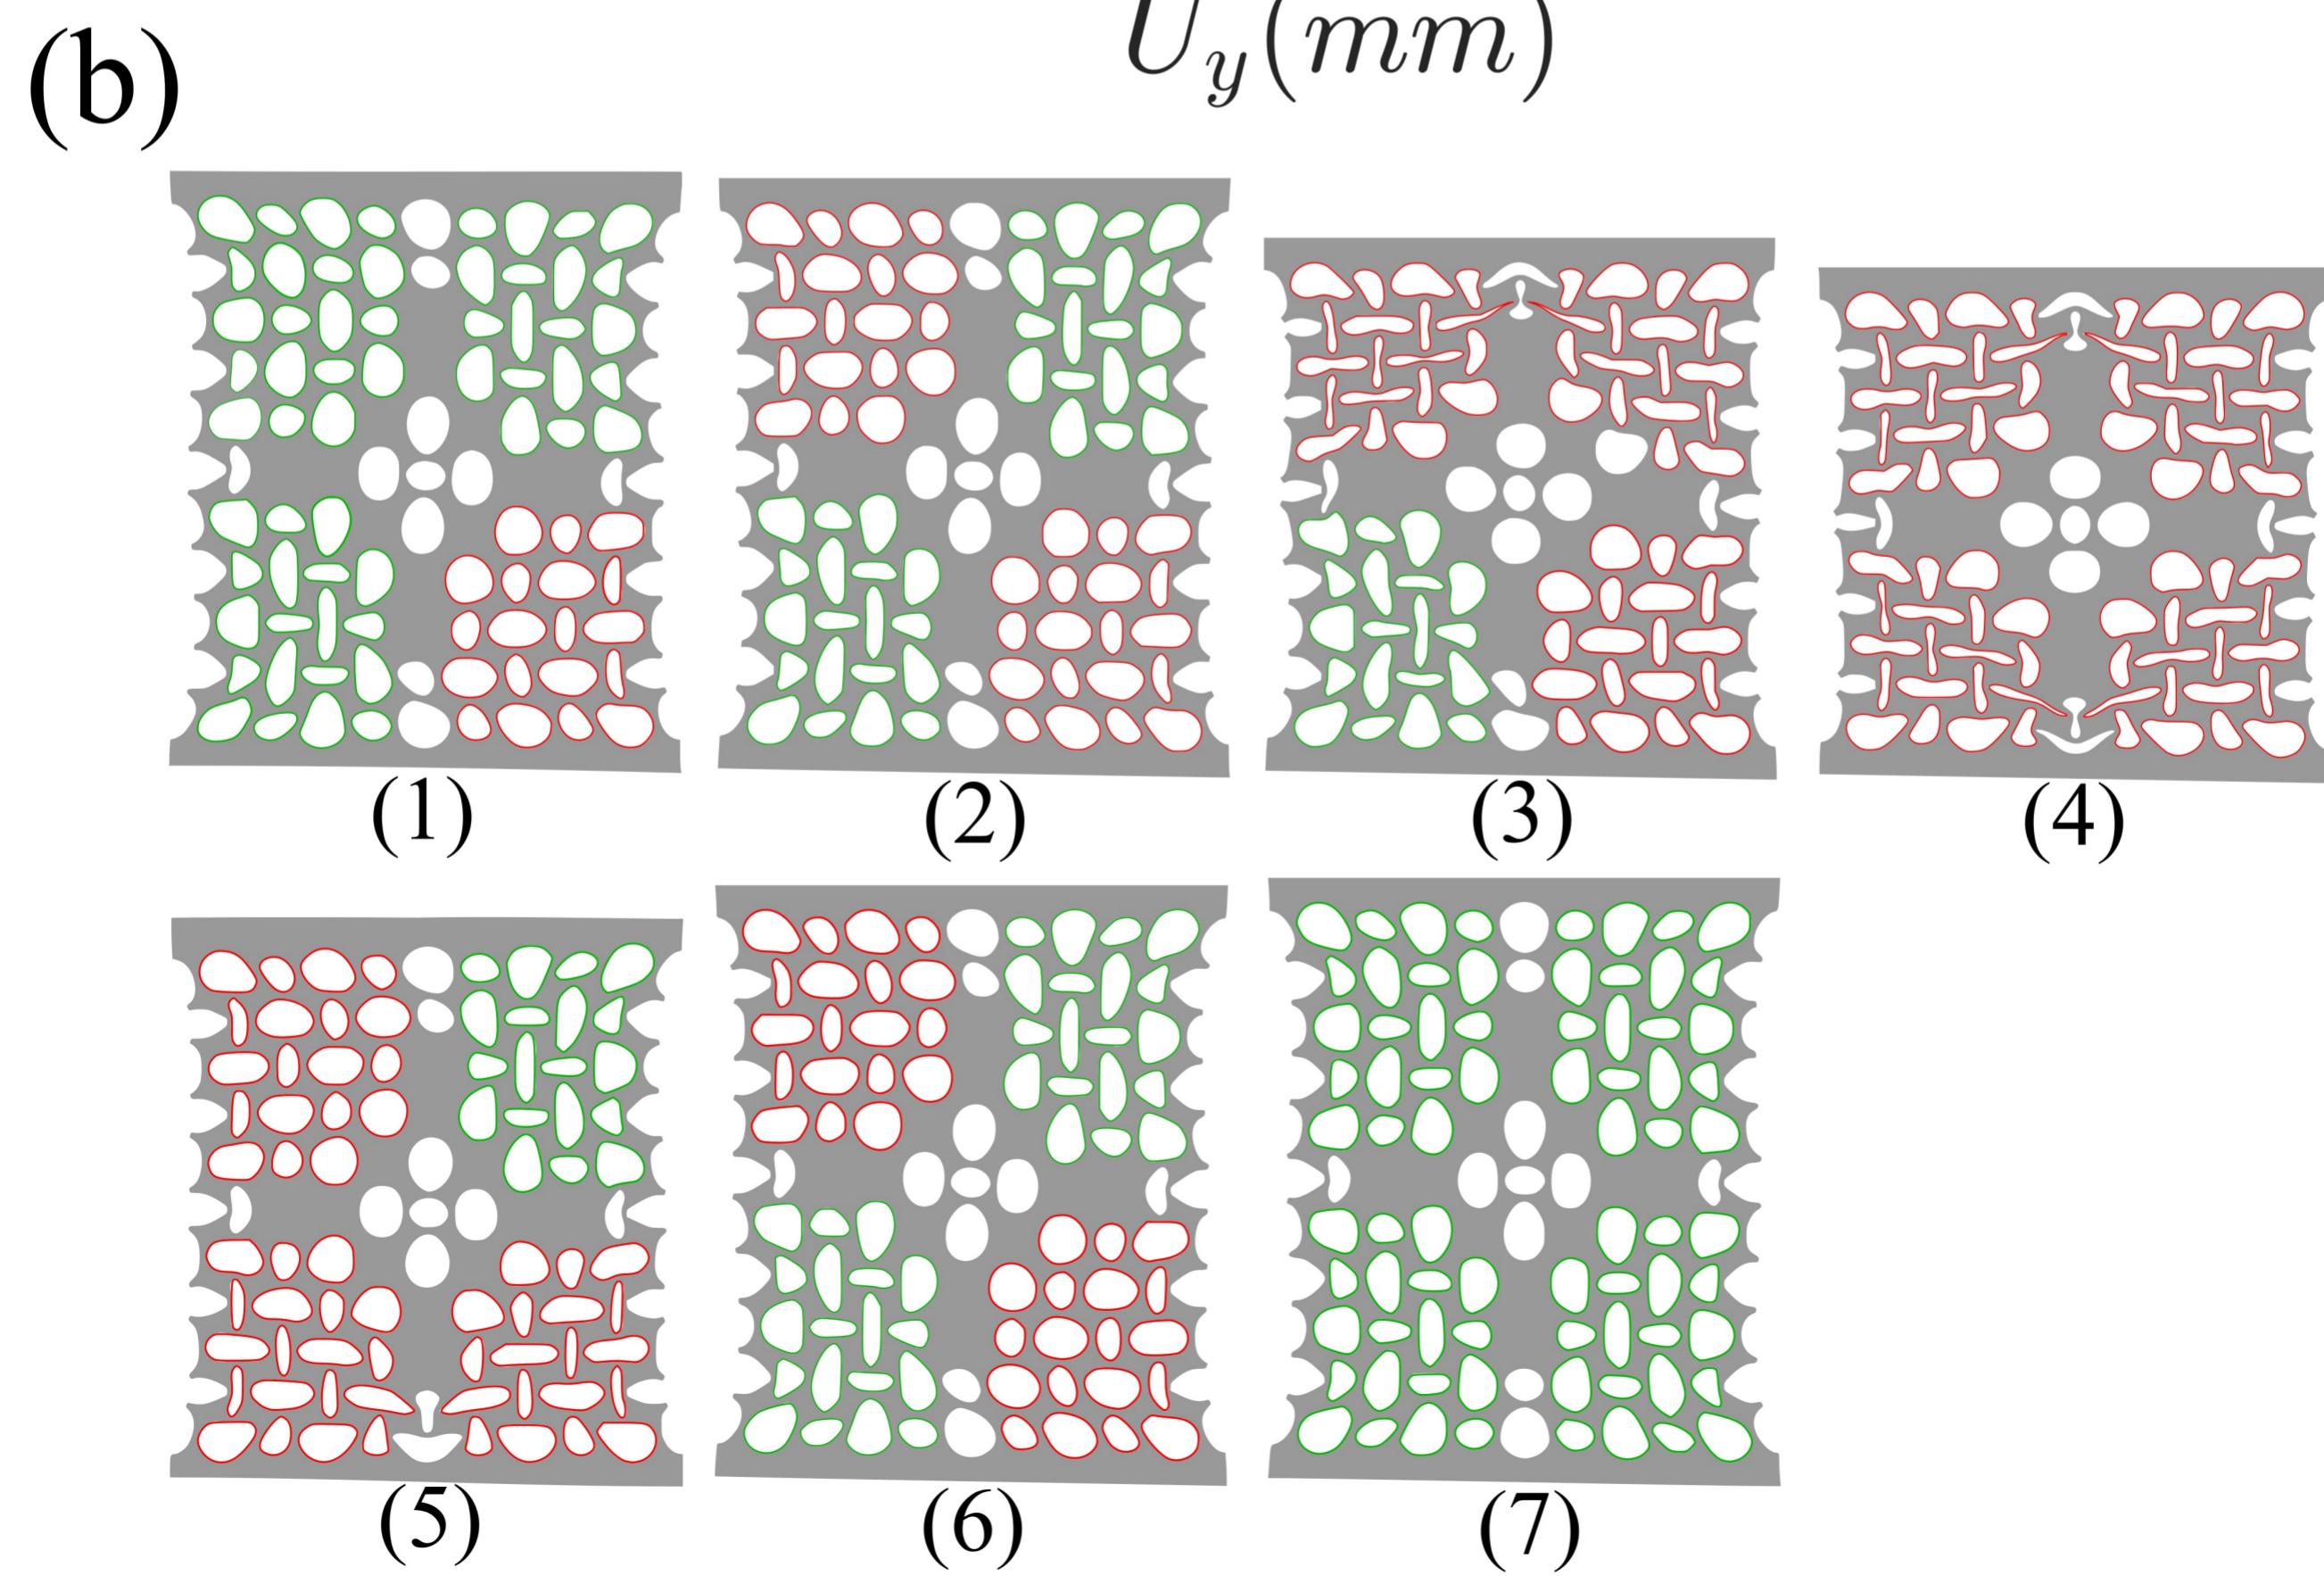

Supplement: d3sm01174g5.pdf [file d3sm01174g5.pdf]
